# Supplementary material for: Whole Genome Sequencing (WGS) Analysis of Virulence and AMR Genes in Extended-Spectrum β-Lactamase (ESBL)-Producing Escherichia coli from Animal and Environmental Samples in Four Italian Swine Farms
Source: MDPI journal article supplement (doi:10.3390/antibiotics11121774), 2022-12-08
Supplement: s1 [file s1]

## Supplementary files

**Supplementary Table S1:**  $\beta$ -lactamase genes belonging to *bla*<sub>CTX-M</sub> and *bla*<sub>TEM</sub> type detected by PCR, Sanger sequencing and WGS from ESBL *E. coli* (n=31) sampled from healthy pigs and farm environment, northern Italy. The sample G1PAE6 was only tested through PCR and Sanger sequencing. \*S1FHE2 resulted positive for *bla*<sub>CTX-M-14</sub> by WGS and not by PCR.

| Sample  | Source           | <i>bla</i> <sub>CTX-M</sub>    | <i>bla</i> <sub>TEM</sub>   |
|---------|------------------|--------------------------------|-----------------------------|
| G1PAE2  | weaned pig       | <i>bla</i> <sub>CTX-M-1</sub>  | <i>bla</i> <sub>TEM-1</sub> |
| G1PAE3  | weaned pig       | <i>bla</i> <sub>CTX-M-1</sub>  | <i>bla</i> <sub>TEM-1</sub> |
| G1PAE4  | weaned pig       | <i>bla</i> <sub>CTX-M-1</sub>  | <i>bla</i> <sub>TEM-1</sub> |
| G1PAE6  | weaned pig       | <i>bla</i> <sub>CTX-M-1</sub>  | neg                         |
| G1PAE7  | weaned pig       | <i>bla</i> <sub>CTX-M-1</sub>  | <i>bla</i> <sub>TEM-1</sub> |
| G1PAE8  | weaned pig       | <i>bla</i> <sub>CTX-M-1</sub>  | <i>bla</i> <sub>TEM-1</sub> |
| G1PAE9  | weaned pig       | <i>bla</i> <sub>CTX-M-1</sub>  | neg                         |
| G1PHE1  | farm environment | <i>bla</i> <sub>CTX-M-15</sub> | neg                         |
| G1PHE2  | farm environment | <i>bla</i> <sub>CTX-M-1</sub>  | neg                         |
| G1SAE2  | sow              | <i>bla</i> <sub>CTX-M-1</sub>  | neg                         |
| G1SAE4  | sow              | <i>bla</i> <sub>CTX-M-1</sub>  | neg                         |
| G1SAE7  | sow              | <i>bla</i> <sub>CTX-M-1</sub>  | neg                         |
| G1SAE8  | sow              | <i>bla</i> <sub>CTX-M-1</sub>  | neg                         |
| G1SAE10 | sow              | <i>bla</i> <sub>CTX-M-1</sub>  | neg                         |
| P1PAE2  | weaned           | <i>bla</i> <sub>CTX-M-14</sub> | <i>bla</i> <sub>TEM-1</sub> |

|         |                  |                                 |                             |
|---------|------------------|---------------------------------|-----------------------------|
| P1PAE3  | weaned           | <i>bla</i> <sub>CTX-M-14</sub>  | <i>bla</i> <sub>TEM-1</sub> |
| P1PAE4  | weaned           | <i>bla</i> <sub>CTX-M-14</sub>  | <i>bla</i> <sub>TEM-1</sub> |
| P1PAE6  | weaned pig       | <i>bla</i> <sub>CTX-M-14</sub>  | <i>bla</i> <sub>TEM-1</sub> |
| P1PAE7  | weaned pig       | <i>bla</i> <sub>CTX-M-14</sub>  | <i>bla</i> <sub>TEM-1</sub> |
| P1PAE8  | weaned pig       | <i>bla</i> <sub>CTX-M-14</sub>  | <i>bla</i> <sub>TEM-1</sub> |
| P1PAE9  | weaned pig       | <i>bla</i> <sub>CTX-M-14</sub>  | <i>bla</i> <sub>TEM-1</sub> |
| P1PAE10 | weaned pig       | <i>bla</i> <sub>CTX-M-14</sub>  | <i>bla</i> <sub>TEM-1</sub> |
| P1FAE7  | finishing pig    | <i>bla</i> <sub>CTX-M-1</sub>   | <i>bla</i> <sub>TEM-1</sub> |
| P1FAE3  | finishing pig    | <i>bla</i> <sub>CTX-M-14</sub>  | neg                         |
| P1FAE1  | finishing pig    | <i>bla</i> <sub>CTX-M-14</sub>  | <i>bla</i> <sub>TEM-1</sub> |
| S1FHE2  | farm environment | <i>bla</i> <sub>CTX-M-14*</sub> | neg                         |
| T1SAE6  | sow              | <i>bla</i> <sub>CTX-M-1</sub>   | neg                         |
| T1SAE7  | sow              | <i>bla</i> <sub>CTX-M-1</sub>   | <i>bla</i> <sub>TEM-1</sub> |
| T1SAE8  | sow              | neg                             | <i>bla</i> <sub>TEM-1</sub> |
| T1SAE9  | sow              | <i>bla</i> <sub>CTX-M-1</sub>   | neg                         |
| T1SAE10 | sow              | <i>bla</i> <sub>CTX-M-1</sub>   | neg                         |

**Supplementary Table S2:** AMR associated genes, with relative function and frequency, detected by WGS in ESBL *E. coli* sampled from healthy pigs and farm environment, northern Italy.

| AMR gene                      | Function                                        | Number of strains with the gene and frequency (%) |
|-------------------------------|-------------------------------------------------|---------------------------------------------------|
| <i>aac(6')-Ib-cr</i>          | Fluoroquinolones and aminoglycosides resistance | 10; 33.3%                                         |
| <i>aac(6')-Ib3</i>            | Amikacin, tobramycin resistance                 | 10; 33.3%                                         |
| <i>aph(3'')-Ib</i>            | Aminoglycoside resistance                       | 6; 20%                                            |
| <i>aph(6)-Id</i>              | Aminoglycoside resistance                       | 1; 3.3%                                           |
| <i>aph(6')-Id</i>             | Aminoglycoside resistance                       | 4; 13.3%                                          |
| <i>aph(4)-Ia</i>              | Aminoglycoside resistance                       | 1; 3.3%                                           |
| <i>aadA1</i>                  | Aminoglycoside resistance                       | 23; 76.7%                                         |
| <i>aadA2</i>                  | Aminoglycoside resistance                       | 5; 16.7%                                          |
| <i>aadA2b</i>                 | Aminoglycoside resistance                       | 10; 33.3%                                         |
| <i>aadA5</i>                  | Aminoglycoside resistance                       | 8; 26.7%                                          |
| <i>bla<sub>CTX-M-1</sub></i>  | Beta-lactam resistance                          | 16; 53.3%                                         |
| <i>bla<sub>CTX-M-14</sub></i> | Beta-lactam resistance                          | 11; 36.7%                                         |
| <i>bla<sub>CTX-M-15</sub></i> | Beta-lactam resistance                          | 1; 3.3%                                           |
| <i>bla<sub>TEM-1A</sub></i>   | Beta-lactam resistance                          | 2; 6.7%                                           |
| <i>bla<sub>TEM-1B</sub></i>   | Beta-lactam resistance                          | 12; 40%                                           |
| <i>bla<sub>TEM-1C</sub></i>   | Beta-lactam resistance                          | 3; 10%                                            |

|                |                                                                        |           |
|----------------|------------------------------------------------------------------------|-----------|
| <i>catA1</i>   | Chloramphenicol resistance                                             | 8; 26.7%  |
| <i>cmlA1</i>   | Phenicol resistance                                                    | 28; 93.3% |
| <i>dfrA12</i>  | Trimethoprim resistance                                                | 8; 26.7%  |
| <i>dfrA17</i>  | Trimethoprim resistance                                                | 8; 26.7%  |
| <i>dfrA36</i>  | Trimethoprim resistance                                                | 1; 3.3%   |
| <i>erm(B)</i>  | Macrolide resistance                                                   | 1; 3.3%   |
| <i>floR</i>    | Phenicol resistance                                                    | 1; 3.3%   |
| <i>mdf(a)</i>  | Multiple resistance to benzalkonium chloride,<br>daunomycin, rhodamine | 30; 100%  |
| <i>mph(A)</i>  | Macrolide resistance                                                   | 16; 53.3% |
| <i>mph(B)</i>  | Macrolide resistance                                                   | 2; 6.7%   |
| <i>qnrS1</i>   | Quinolone resistance                                                   | 11; 36.7% |
| <i>sitABCD</i> | Peroxide hydrogen resistance                                           | 16; 53.3% |
| <i>sul1</i>    | Sulphonamide resistance                                                | 2; 6.7%   |
| <i>sul2</i>    | Sulphonamide resistance                                                | 10; 33.3% |
| <i>sul3</i>    | Sulphonamide resistance                                                | 17; 56.7% |
| <i>tet(A)</i>  | Tetracycline resistance                                                | 19; 63.3% |
| <i>tet(B)</i>  | Tetracycline resistance                                                | 6; 20%    |

**Supplementary Table S3:** virulence genes, with relative function and frequency, detected by WGS in ESBL *E. coli* sampled from healthy pigs and farm environment, northern Italy.

| Virulence gene | function                                                         | Number of strains with the gene and frequency (%) |
|----------------|------------------------------------------------------------------|---------------------------------------------------|
| <i>astA</i> ,  | EAST-1 heat-stable toxin                                         | 6; 20%                                            |
| <i>cea</i>     | colicin E1                                                       | 11; 36.7%                                         |
| <i>celb</i> ,  | Endonuclease colicin E2                                          | 7; 23.3%                                          |
| <i>chua</i>    | Outer membrane hemin receptor                                    | 4; 13.3%                                          |
| <i>cia</i>     | Colicin ia                                                       | 10; 33.3%                                         |
| <i>cib</i>     | Colicin ib                                                       | 5; 16.7%                                          |
| <i>cma</i>     | Colicin M                                                        | 1; 3.3%                                           |
| <i>cvaC</i> ,  | Microcin C                                                       | 14; 46.7%                                         |
| <i>eilA</i>    | Salmonella HilA homolog                                          | 3; 10%                                            |
| <i>etsC</i>    | Putative type I secretion outer membrane protein                 | 14; 46.7%                                         |
| <i>fyuA</i>    | Siderophore receptor                                             | 2; 6.7%                                           |
| <i>gad</i>     | Glutamate decarboxylase                                          | 6; 20%                                            |
| <i>hlyF</i>    | Hemolysin F                                                      | 15; 50%                                           |
| <i>hra</i>     | Heat-resistant agglutinin                                        | 4; 13.3%                                          |
| <i>ireA</i>    | Siderophore receptor                                             | 1; 3.3%                                           |
| <i>iroN</i> ,  | Enterobactin siderophore receptor protein                        | 14; 46.7%                                         |
| <i>lrp2</i>    | High molecular weight protein 2 non-ribosomal peptide synthetase | 2; 6.7%                                           |
| <i>iss</i>     | Increased serum survival                                         | 16; 53.3%                                         |
| <i>iucC</i>    | Aerobactin synthetase                                            | 15; 50%                                           |

|                  |                                                      |           |
|------------------|------------------------------------------------------|-----------|
| <i>iutA</i> ,    | Ferric aerobactin receptor                           | 15; 50%   |
| <i>katP</i>      | Plasmid-encoded catalase peroxidase                  | 1; 3.3%   |
| <i>kpsE</i> ,    | Capsule polysaccharide export inner-membrane protein | 5; 16.7%  |
| <i>kpsMII</i> ,  | Polysialic acid transport protein; Group 2 capsule   | 5; 16.7%  |
| <i>kpsMII_K5</i> | Polysialic acid transport protein; Group 2 capsule   | 1; 3.3%   |
| <i>lpfA</i>      | Long polar fimbriae                                  | 21; 70%   |
| <i>ltcA</i>      | Heat-labile enterotoxin A subunit                    | 2; 6.7%   |
| <i>mchF</i> ,    | ABC transporter protein MchF                         | 15; 50%   |
| <i>neuC</i>      | polysialic acid capsule biosynthetic protein         | 1; 3.3%   |
| <i>ompT</i>      | Outer membrane protease (protein protease 7)         | 20; 66.7% |
| <i>papC</i> ,    | Outer membrane usher P fimbriae                      | 2; 6.7%   |
| <i>sitA</i> ,    | Iron transport protein                               | 16; 53.3% |
| <i>stb</i>       | Heat-stable enterotoxin II                           | 3; 10%    |
| <i>terC</i> ,    | Tellurium ion resistance protein                     | 30; 100%  |
| <i>traT</i>      | Outer membrane protein complement resistance         | 21; 70%   |
| <i>tsh</i>       | Temperature-sensitive hemagglutinin                  | 5; 16.7%  |
| <i>vat</i>       | Vacuolating autotransporter toxin                    | 1; 3.3%   |

**Supplementary Table S4:** potential human pathogenicity, expressed as percentage, of ESBL *E. coli* sampled from healthy pigs and farm environment, northern Italy. Results were obtained through PathogenFinder 1.1 (<https://cge.cbs.dtu.dk/services/>).

| Strains | Probability of human pathogenicity |
|---------|------------------------------------|
| G1PAE2  | 88%                                |
| G1PAE3  | 88%                                |
| G1PAE4  | 88%                                |
| G1PAE7  | 88%                                |
| G1PAE8  | 89%                                |
| G1PAE9  | 87%                                |
| G1PHE1  | 84%                                |
| G1PHE2  | 93%                                |
| G1SAE2  | 94%                                |
| G1SAE4  | 89%                                |
| G1SAE8  | 89%                                |
| G1SAE7  | 95%                                |
| G1SAE10 | 89%                                |
| P1FAE1  | 93%                                |
| P1FAE3  | 93%                                |
| P1FAE7  | 92%                                |
| P1PAE2  | 93%                                |

|                |     |
|----------------|-----|
| <b>P1PAE3</b>  | 89% |
| <b>P1PAE4</b>  | 93% |
| <b>P1PAE6</b>  | 89% |
| <b>P1PAE7</b>  | 89% |
| <b>P1PAE8</b>  | 89% |
| <b>P1PAE9</b>  | 89% |
| <b>P1PAE10</b> | 93% |
| <b>S1FHE2</b>  | 88% |
| <b>T1SAE6</b>  | 83% |
| <b>T1SAE7</b>  | 88% |
| <b>T1SAE8</b>  | 87% |
| <b>T1SAE9</b>  | 88% |
| <b>T1SAE10</b> | 83% |

**Supplementary Table S5:** WGS quality parameters of all analysed *E. coli* strains.

| <b>Strains</b> | <b>Contigs</b> | <b>Reads/length reads</b> | <b>Coverage</b> | <b>N50</b> | <b>length</b> | <b>GC%</b> |
|----------------|----------------|---------------------------|-----------------|------------|---------------|------------|
| G1PAE2         | 70             | 1006488/<br>224           | 46x             | 240995     | 4908608       | 50.45      |
| G1PAE3         | 94             | 541164/<br>234            | 26x             | 157912     | 4937072       | 50.39      |



|         |     |                 |     |        |         |       |
|---------|-----|-----------------|-----|--------|---------|-------|
| G1PAE4  | 63  | 1122266/<br>233 | 53x | 240584 | 4907891 | 50.45 |
| G1PAE7  | 151 | 896196/<br>220  | 37x | 97282  | 5291539 | 50.47 |
| G1PAE8  | 66  | 911856/<br>232  | 42x | 209216 | 5057771 | 50.71 |
| G1PAE9  | 51  | 1198842/<br>236 | 58x | 208729 | 4852108 | 50.65 |
| G1PHE1  | 121 | 787752/<br>235  | 40x | 73509  | 4612127 | 50.61 |
| G1PHE2  | 86  | 708166/<br>229  | 32x | 179714 | 5132633 | 50.62 |
| G1SAE2  | 161 | 533048/<br>235  | 26x | 71036  | 4862726 | 50.55 |
| G1SAE4  | 99  | 1367040/<br>224 | 64x | 95864  | 4802459 | 50.65 |
| G1SAE8  | 100 | 615278/<br>224  | 29x | 91912  | 4801399 | 50.66 |
| G1SAE10 | 101 | 1126712/<br>223 | 52x | 95864  | 4802832 | 50.64 |

|        |     |                 |     |        |         |       |
|--------|-----|-----------------|-----|--------|---------|-------|
| P1FAE1 | 72  | 1728010/<br>232 | 78x | 209689 | 5110356 | 50.61 |
| P1FAE3 | 145 | 1168964/<br>231 | 52x | 111436 | 5175856 | 50.75 |
| P1FAE7 | 157 | 2051676/<br>229 | 97x | 76744  | 4837638 | 50.68 |
| P1PAE2 | 295 | 432122/<br>230  | 20x | 41072  | 5078038 | 50.52 |
| P1PAE3 | 73  | 1084192/<br>219 | 45x | 297184 | 5267640 | 50.42 |
| P1PAE4 | 119 | 563930/<br>229  | 25x | 145436 | 5124857 | 50.51 |
| P1PAE6 | 97  | 1196434/<br>221 | 52x | 179311 | 5124981 | 50.52 |
| P1PAE7 | 167 | 530858/<br>226  | 23x | 70982  | 5106936 | 50.52 |
| P1PAE8 | 105 | 1093036/<br>218 | 47x | 179593 | 5121840 | 50.52 |
| P1PAE9 | 98  | 1145512/<br>225 | 50x | 177776 | 5125014 | 50.52 |

|         |     |                 |      |        |         |       |
|---------|-----|-----------------|------|--------|---------|-------|
| P1PAE10 | 92  | 2444398/<br>219 | 106x | 189765 | 5026802 | 50.57 |
| S1FHE2  | 127 | 967314/<br>219  | 40x  | 176978 | 5316621 | 50.50 |
| T1SAE6  | 101 | 845024/<br>205  | 36x  | 105200 | 4777837 | 50.77 |
| T1SAE7  | 95  | 2079994/<br>219 | 94x  | 136287 | 4841785 | 50.68 |
| T1SAE8  | 116 | 1029662/<br>224 | 51x  | 75014  | 4543562 | 50.81 |
| T1SAE9  | 82  | 1074586/<br>223 | 50x  | 127839 | 4756721 | 50.60 |
| T1SAE10 | 99  | 826014/<br>224  | 38x  | 111806 | 4853313 | 50.90 |

**Supplementary table S6:** identification of virulence and AMR genes on plasmids located on specific contigs of G1PAE2 genome. To confirm the presence of virulence and/or AMR genes on particular plasmids, tools (PlasmidFinder, ResFinder and VirulenceFinder) from Center for Genomic Epidemiology (<https://cge.cbs.dtu.dk/services/>) were used. NS, no significant hits.

| Strain | Contig | PlasmidFinder                                                                                               | VirulenceFinder | ResFinder |
|--------|--------|-------------------------------------------------------------------------------------------------------------|-----------------|-----------|
| G1PAE2 | 34     | IncFIA 99.74 388 / 388<br>G1PAE2_S18_L001_R1_001_(paired_trimmed_pairs)_cont<br>ig_34 6022..6408 - AP001918 | NS              | NS        |

|  |    |                                                                                                                    |                                                                                                                                                                                                                                                                                   |                                                                                                                                                                                                                                                                                                                                                                                                                                                                                                    |
|--|----|--------------------------------------------------------------------------------------------------------------------|-----------------------------------------------------------------------------------------------------------------------------------------------------------------------------------------------------------------------------------------------------------------------------------|----------------------------------------------------------------------------------------------------------------------------------------------------------------------------------------------------------------------------------------------------------------------------------------------------------------------------------------------------------------------------------------------------------------------------------------------------------------------------------------------------|
|  | 31 | IncFIB(AP001918) 99.56 682 / 682<br>G1PAE2_S18_L001_R1_001_(paired,_trimmed_pairs)_contig_31 7274..7955 - AP001918 | hlyF 100 1110 / 1110<br>G1PAE2_S18_L001_R1_001_(paired,_trimmed_pairs)_contig_31 3116..4225 Hemolysin F<br>UGFJ01000001<br><br>ompT 99.79 954 / 954<br>G1PAE2_S18_L001_R1_001_(paired,_trimmed_pairs)_contig_31 1730..2683 Outer membrane protease (protein protease 7) MG692627  | NS                                                                                                                                                                                                                                                                                                                                                                                                                                                                                                 |
|  | 36 | IncFIC(FII) 95.79 499 / 499<br>G1PAE2_S18_L001_R1_001_(paired,_trimmed_pairs)_contig_36 24152..24648 - AP001918    | cia 94.07 253 / 264<br>G1PAE2_S18_L001_R1_001_(paired,_trimmed_pairs)_contig_36 28783..29035 Colicin ia<br>UGDH01000002<br><br>traT 100 831 / 831<br>G1PAE2_S18_L001_R1_001_(paired,_trimmed_pairs)_contig_36 11870..12700 Outer membrane protein complement resistance NC_011964 | NS                                                                                                                                                                                                                                                                                                                                                                                                                                                                                                 |
|  | 9  | IncI1-I(Alpha) 99.3 142 / 142<br>G1PAE2_S18_L001_R1_001_(paired,_trimmed_pairs)_contig_9 9349..9490 - AP005147     | NS                                                                                                                                                                                                                                                                                | NS                                                                                                                                                                                                                                                                                                                                                                                                                                                                                                 |
|  | 43 | IncX1 99.2 377 / 377<br>G1PAE2_S18_L001_R1_001_(paired,_trimmed_pairs)_contig_43 6528..6904 - JN935898             | NS                                                                                                                                                                                                                                                                                | NS                                                                                                                                                                                                                                                                                                                                                                                                                                                                                                 |
|  | 46 | NS                                                                                                                 | NS                                                                                                                                                                                                                                                                                | <p>aadA1   100   792/792   100   1..792  <br/>G1PAE2_S18_L001_R1_001_(paired,_trimmed_pairs)_contig_46   10820..11611   Aminoglycoside resistance   JQ414041  </p> <p>aadA2b   99.8718   780/780   100   1..780  <br/>G1PAE2_S18_L001_R1_001_(paired,_trimmed_pairs)_contig_46   8427..9206   Aminoglycoside resistance   D43625</p> <p>sul3   100   792/792   100   1..792  <br/>G1PAE2_S18_L001_R1_001_(paired,_trimmed_pairs)_contig_46   13293..14084   Sulphonamide resistance   AJ459418</p> |

|  |    |    |    |                                                                                                                                                                                                                                                                                                                                                                                                                                                                                                                                                                                                                                                                     |
|--|----|----|----|---------------------------------------------------------------------------------------------------------------------------------------------------------------------------------------------------------------------------------------------------------------------------------------------------------------------------------------------------------------------------------------------------------------------------------------------------------------------------------------------------------------------------------------------------------------------------------------------------------------------------------------------------------------------|
|  |    |    |    | <p>blaCTX-M-1   100   876/876   100   1..876  <br/>G1PAE2_S18_L001_R1_001_(paired,_trimmed_pairs)_contig_46   18284..19159   Beta-lactam resistance   DQ915955</p> <p>qacL   92.2156   501/533   93.9962   1..501  <br/>G1PAE2_S18_L001_R1_001_(paired,_trimmed_pairs)_contig_46   11681..12181   Disinfectant resistance   NG_048048</p> <p>catA1   99.8485   660/660   100   1..660  <br/>G1PAE2_S18_L001_R1_001_(paired,_trimmed_pairs)_contig_46   119..778   Phenicol resistance   V00622  </p> <p>cmlA1   99.9206   1260/1260   100   1..1260  <br/>G1PAE2_S18_L001_R1_001_(paired,_trimmed_pairs)_contig_46   9468..10727   Phenicol resistance   M64556</p> |
|  | 55 | NS | NS | <p>tet(A)   100   1200/1200   100   1..1200  <br/>G1PAE2_S18_L001_R1_001_(paired,_trimmed_pairs)_contig_55   2349..3548   Tetracycline resistance   AJ517790</p> <p>blaTEM-1C   100   861/861   100   1..861  <br/>G1PAE2_S18_L001_R1_001_(paired,_trimmed_pairs)_contig_55   4041..4901   Beta-lactam resistance Alternate name; RblaTEM-1   FJ560503</p>                                                                                                                                                                                                                                                                                                          |

**Supplementary table S7:** comparison of plasmid-positive contigs found in G1PAE2 *E. coli* strain with sequences recorded in BLAST<sup>®</sup> database (<https://blast.ncbi.nlm.nih.gov/Blast.cgi>). The best match is reported in the last column on the right

| Strain | Contig | Length | Best BLAST hit                                                                                                                          |
|--------|--------|--------|-----------------------------------------------------------------------------------------------------------------------------------------|
| G1PAE2 | 9      | 27044  | plasmid<br>G1PAE2_S18_L001_R1_001_(paired,_trimmed_pairs)_contig_9<br>KJ484639.1 99.945 25634 6 8 1<br>25626 63878 89511 0.0 47253      |
|        | 31     | 9806   | plasmid<br>G1PAE2_S18_L001_R1_001_(paired,_trimmed_pairs)_contig_31<br>MG649031.1 99.959 9806 4 0 1<br>9806 10030 225 0.0 18087         |
|        | 34     | 13565  | plasmid<br>G1PAE2_S18_L001_R1_001_(paired,_trimmed_pairs)_contig_34<br>CP056956.1 99.978 13565 3 0 1<br>13565 131729 118165 0.0 25034   |
|        | 36     | 30201  | plasmid<br>G1PAE2_S18_L001_R1_001_(paired,_trimmed_pairs)_contig_36<br>CP056956.1 99.985 13637 2 0 16565<br>30201 78444 64808 0.0 25172 |
|        | 43     | 44395  | plasmid<br>G1PAE2_S18_L001_R1_001_(paired,_trimmed_pairs)_contig_43<br>CP062857.1 99.955 35762 16 0 8634<br>44395 44395 8634 0.0 65952  |
|        | 46     | 22534  | plasmid<br>G1PAE2_S18_L001_R1_001_(paired,_trimmed_pairs)_contig_46<br>CP026933.2 100.000 15917 0 0 20<br>15936 176072 160156 0.0 29394 |
|        | 55     | 5785   | plasmid<br>G1PAE2_S18_L001_R1_001_(paired,_trimmed_pairs)_contig_55<br>OW848878.1 100.000 4445 0 0 1341<br>5785 13217 8773 0.0 8209     |
